# Supplementary material for: Highly efficient photoelectrochemical water oxidation enabled by enhanced interfacial interaction in 2D/1D In2S3@Bi2S3 heterostructures
Source: Royal Society of Chemistry journal article supplement (doi:10.1039/d0ta00149j), 2020-01-01
Supplement: d0ta00149j1.pdf [file d0ta00149j1.pdf]

## *Supporting Information*

### **1. Materials**

Fluorine doped tin oxide (FTO, Nippon Sheet Glass, Japan, 2.2 mm thick, 14  $\Omega$ ) substrates were purchased from Wu Han Jinge-solar Energy Technology Co., Ltd. The FTO glasses were sonicated sequentially in acetone, ethanol, and distilled water for 30 minutes, respectively. Indium trichloride ( $\text{InCl}_3$ , metals basis, 99.99%), bismuth chloride ( $\text{BiCl}_3$ , AR,  $\geq 99\%$ ), thioacetamide ( $\text{CH}_3\text{CSNH}_2$ , metals basis, 99.999%), ethylene glycol ( $(\text{CH}_2\text{OH})_2$ , AR, 99.9%), sodium sulfate ( $\text{Na}_2\text{SO}_4$ , AR, 99.5%), and sodium sulphite ( $\text{Na}_2\text{SO}_3$ , AR, 99.5%) were purchased from Aladdin and all chemicals were used without any further purification. Deionized water was used for preparation of solutions and washing.

### **2. Physical characterization**

The X-ray diffraction (XRD) was detected on a Shimadzu ZD-3AX diffractometer with Cu  $K\alpha$  radiation ( $\lambda = 1.5418 \text{ \AA}$ ). The  $2\theta$  scanning angular range was from  $10^\circ$  to  $90^\circ$  with rate of  $2^\circ$  per minute. Raman spectra of these samples were conducted by using LabRAM HR Evolution ( $\lambda_{\text{exc}} = 532 \text{ nm}$ ). The morphologies and high-resolution microstructure images were recorded through a field emission scanning electron microscope (FE-SEM, Nova 400 Nano-SEM) and transmission electron microscope (TEM, Talos F200S, 200kV). The surface composition and chemical state was carried out by the X-ray photoelectron spectroscopy (XPS,

ESCALab250) technique, all spectra were calibrated by using the C 1s peak at 284.8 eV. The optical properties of as-prepared samples were performed by a spectrophotometer (UV-3600, Shimadzu) in the region of 300 - 900 nm, room temperature photoluminescence (PL) measurement were carried out with a fluorescence spectrometer (Cary eclipse) with an excitation wavelength of 365 nm; the measured powder was scraped from the FTO substrate.

### 3. Photoelectrochemical measurements

Electrochemical tests were carried out by using a Zahner Zennium electrochemical workstation (Zennium and PP211, Germany) in a standard three-electrode configuration, a photoanode (1 cm<sup>2</sup>) used as the working electrode. Meanwhile, a Pt coil (diameter is about 1 mm, length is about 5 cm) served as the counter electrode, an Ag/AgCl electrode (saturated KCl) used as the reference electrode. The photo-response of the synthesized electrodes were measured under front-side illumination by a 300 W Xenon arc lamp (NBet HSX-F300, China) equipped with an AM 1.5G filter (Ceaulight). The intensity of the light source was calibrated with a UV enhanced silicon photo-detector (Newport, Models 1916C and 818-UV) to simulate one solar illumination (100 mW cm<sup>-2</sup>). The applied potential versus Ag/AgCl was converted to RHE by the Nernst equation:

$$E_{\text{RHE}} = E_{\text{Ag/AgCl}} + 0.0591 \text{ pH} + E^{\circ}_{\text{Ag/AgCl}} \quad (1)$$

$E^{\circ}_{\text{Ag/AgCl}}$  is 0.1976 V vs. RHE at 25 °C. In a typical experiment, 0.2 M Na<sub>2</sub>SO<sub>4</sub> (pH 6.8) with/without 0.5 M Na<sub>2</sub>SO<sub>3</sub> as a hole scavenger was used as the

electrolyte. For all samples, a positive scan rate of 25 mV s<sup>-1</sup> was used for the photocurrent-voltage (*J-V*) measurements. Photocurrent stability tests were performed at a fixed bias potential of 0.90 V vs. RHE and the incident photo to current efficiency (IPCE) performance was performed at 1.23 V vs. RHE under illumination. The IPCE is expressed by the following equation:

$$\text{IPCE} = (J \times 1240) / (P_{\text{light}} \times \lambda) \quad (2)$$

where *J* is the measured photocurrent density at a specific wavelength (mA cm<sup>-2</sup>),  $\lambda$  is the incident light wavelength (nm), and  $P_{\text{light}}$  is the recorded irradiance intensity at a specific wavelength (mW cm<sup>-2</sup>). The photovoltages of various photoanodes were estimated by the onset potential (*E*) shift of the anodic current in dark and under illumination. The controlled intensity modulated photo spectroscopy (CIMPS) was conducted with the frequency range from 10k to 1 Hz with water oxidation, which was conducted by a constant power density ( $\lambda = 365$  nm, 5 mW cm<sup>-2</sup>) under different potential. The charge transport time ( $\tau$ ) could be calculated by the following equation,

$$\tau = 1 / 2\pi f \quad (3)$$

where  $\tau$  and *f* are electron transport time across the film and the minimum characteristic frequency. Mott-Schottky plots were obtained in 0.2 M Na<sub>2</sub>SO<sub>4</sub> at an ac frequency of 500 and 1000 Hz. The carrier concentration and the flat band potential can be estimated by the following equation:

$$(A_s / C_{\text{bulk}})^2 = (2 / e\epsilon\epsilon_0 N_d) [V - V_{\text{fb}} - k_B T / e] \quad (4)$$

where *A<sub>s</sub>* is the efficient area of electrode, *C<sub>bulk</sub>* is the space charge capacitance,  $\epsilon$  is

the dielectric constant of the samples,  $\epsilon_0$  is the permittivity under vacuum ( $8.85 \times 10^{-12} \text{ C}^2 \text{ J}^{-1} \text{ m}^{-2}$ ).  $N_d$  is the carrier density of the samples,  $V$  is the applied potential,  $V_{fb}$  is the flat band potential,  $k_B$  is the Boltzmann constant ( $1.38 \times 10^{-23} \text{ J K}^{-1}$ ),  $T$  (298 K) is the absolute temperature, and  $e$  is the electron charge ( $1.602 \times 10^{-19} \text{ C}$ ).

#### 4. Calculations for the efficiencies of charge separation and oxidation kinetics

The photocurrent density arising from PEC performance ( $J_{\text{water}}$ ) can be described as follows:

$$J_{\text{water}} = J_{\text{abs}} \times \eta_{\text{sep}} \times \eta_{\text{ox}} \quad (5)$$

where  $J_{\text{abs}}$  is the photocurrent density when completely converting the absorbed photons into current (i.e., APCE = 100%).  $\eta_{\text{sep}}$  is the efficiency of charge separation and  $\eta_{\text{ox}}$  is the efficiency of surface oxidation kinetics. Adding 0.5 M  $\text{Na}_2\text{SO}_3$  to the electrolyte can completely suppress the surface recombination of charge carriers without influencing the charge separation in the electrode bulk (i.e.,  $\eta_{\text{ox}} = 100\%$ ).

Therefore,  $\eta_{\text{sep}}$  and  $\eta_{\text{ox}}$  can be expressed as follows:

$$\eta_{\text{sep}} = J_{\text{sulfite}} / J_{\text{abs}} \quad (6)$$

$$\eta_{\text{ox}} = J_{\text{water}} / J_{\text{sulfite}} \quad (7)$$

where  $J_{\text{water}}$  is the photocurrent density for water oxidation;  $J_{\text{sulfite}}$  is the photocurrent density for sulfite oxidation. By estimating the overlapped areas between the AM 1.5G illumination, assuming APCE = 100%, the  $J_{\text{abs}}$  of  $\text{Bi}_2\text{S}_3$ ,  $\text{In}_2\text{S}_3$ , and  $\text{In}_2\text{S}_3@\text{Bi}_2\text{S}_3$  photoanodes are derived to be around 5.6, 4.2, and 6.5  $\text{mA cm}^{-2}$ .

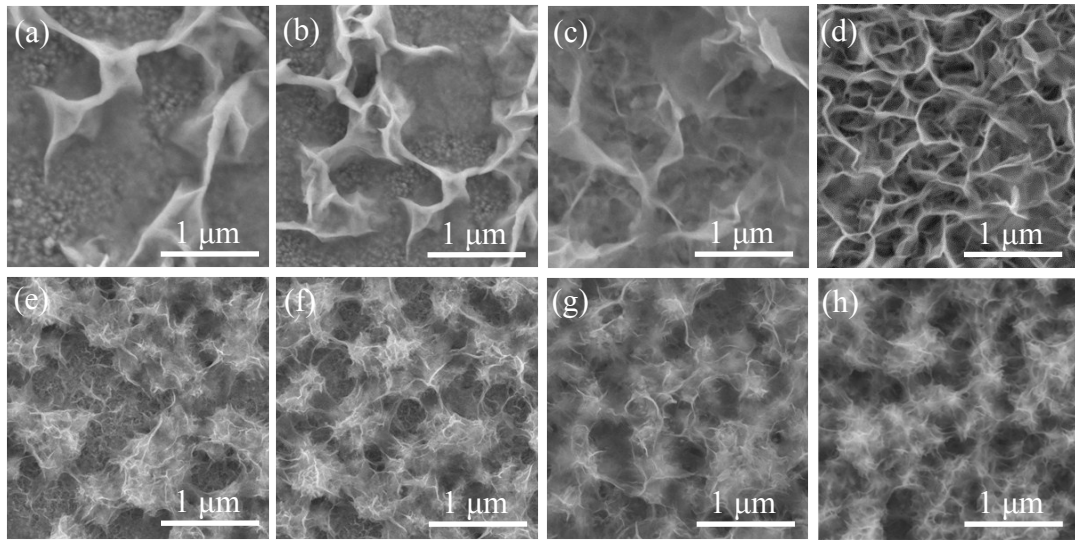

**Fig. S1.** SEM images of  $\text{In}_2\text{S}_3$  synthesized by different concentrations of indium trichloride in ethylene glycol solvothermal process, including (a) 3 mM, (b) 6 mM, (c) 12 mM, and (d) 20 mM. SEM images of typical  $\text{In}_2\text{S}_3@\text{Bi}_2\text{S}_3$  structures by using different concentrations of indium trichloride, including (e) 3 mM, (f) 6 mM, (g) 12 mM, and (h) 20 mM of indium trichloride. For the optimized structure of  $\text{In}_2\text{S}_3@\text{Bi}_2\text{S}_3$ , the inner layer  $\text{Bi}_2\text{S}_3$  was fabricated by using 20 mM bismuth chloride and 35 mM thioacetamide, and then served as the substrate for growing the  $\text{In}_2\text{S}_3@\text{Bi}_2\text{S}_3$  heterostructures.

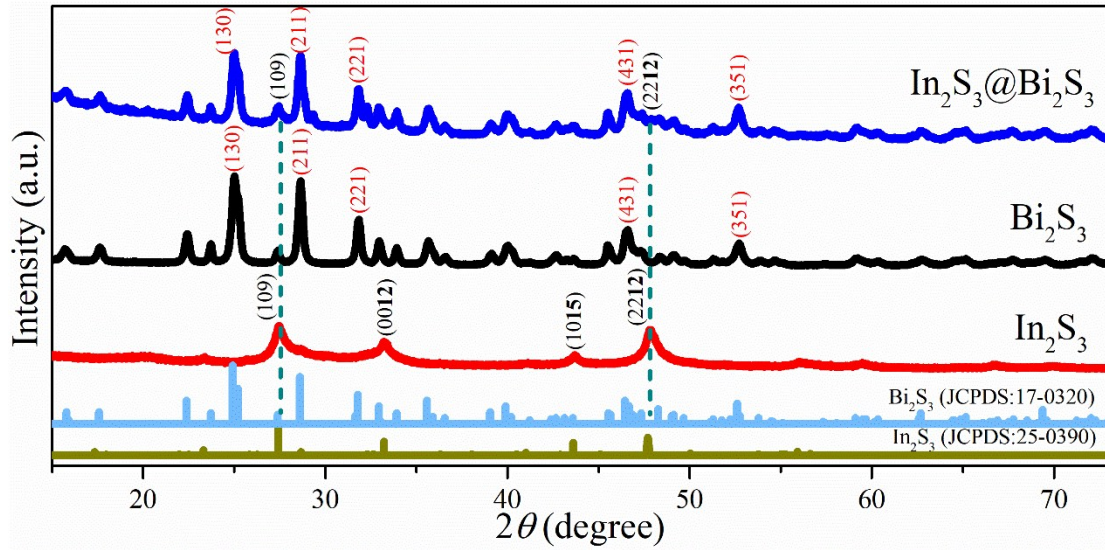

**Fig. S2.** The XRD patterns of  $\text{In}_2\text{S}_3$ ,  $\text{Bi}_2\text{S}_3$ , and  $\text{In}_2\text{S}_3@\text{Bi}_2\text{S}_3$ . The mismatched lattice parameters of  $\text{In}_2\text{S}_3$  ( $a = 7.691$ ,  $b = 7.691$ , and  $c = 32.329$  Å) and  $\text{Bi}_2\text{S}_3$  ( $a = 11.149$ ,  $b = 11.304$ , and  $c = 3.981$  Å) in crystalline structure will lead to lattice strain when the two structures grow together. Moreover, the diffraction peaks situated at  $24.93^\circ$ ,  $28.61^\circ$ ,  $31.79^\circ$ ,  $46.46^\circ$  and  $52.62^\circ$  are consistent with the planes of (130), (211), (221), (431), and (351) with  $\text{Bi}_2\text{S}_3$ , while the diffraction peaks located at  $27.43^\circ$ ,  $33.23^\circ$ ,  $43.60^\circ$ , and  $47.70^\circ$  agree well with the planes of (109), (0012), (1015), and (2212) by pure  $\text{In}_2\text{S}_3$ .

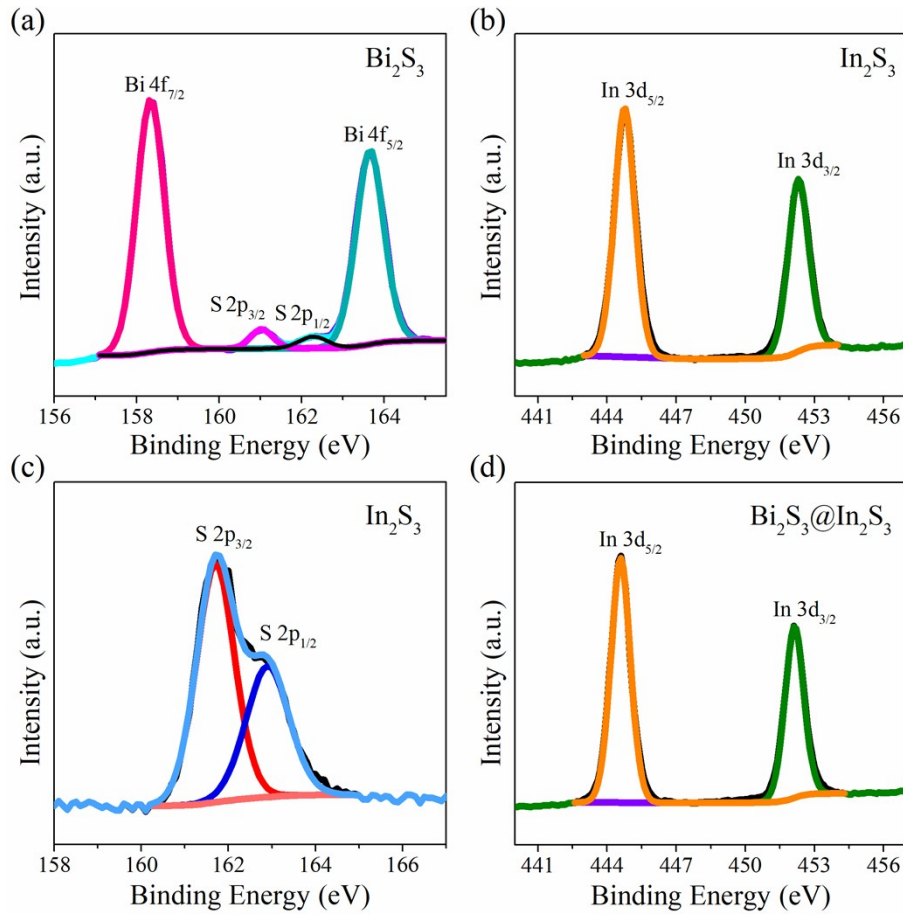

**Fig. S3.** XPS spectra of (a) Bi 4f and S 2p orbitals for  $\text{Bi}_2\text{S}_3$ , (b) In 3d and (c) S 2p orbitals for  $\text{In}_2\text{S}_3$ , and (d) the In 3d orbitals for  $\text{In}_2\text{S}_3@\text{Bi}_2\text{S}_3$ .

The characteristic Bi  $4f_{7/2}$  and Bi  $4f_{5/2}$  peaks appeared at 158.3 and 163.6 eV, which is consistent with the standard  $\text{Bi}^{3+}$  peaks of  $\text{Bi}_2\text{S}_3$ .<sup>1</sup> The signals located between Bi  $4f_{5/2}$  and Bi  $4f_{7/2}$  could be attributed to the S  $2p_{1/2}$  at 162.3 eV and the S  $2p_{3/2}$  at 161.1 eV. The In  $3d_{5/2}$  and In  $3d_{3/2}$  are located at 444.9 and 452.4 eV with a  $\Delta E$  of 7.5 eV, demonstrating the typically  $\text{In}^{3+}$ . The two strong peaks at 161.7 and 162.9 eV are corresponding to the S  $2p_{3/2}$  and S  $2p_{1/2}$ .<sup>2</sup> The In 3d spectrum consists of In  $3d_{5/2}$  (444.8 eV) and In  $3d_{3/2}$  (452.3 eV) for  $\text{In}_2\text{S}_3@\text{Bi}_2\text{S}_3$ . The lower binding energies of  $\text{In}^{3+}$  suggests the change of chemical bonding energy with interfacial electronic interaction in  $\text{In}_2\text{S}_3@\text{Bi}_2\text{S}_3$  heterostructures.

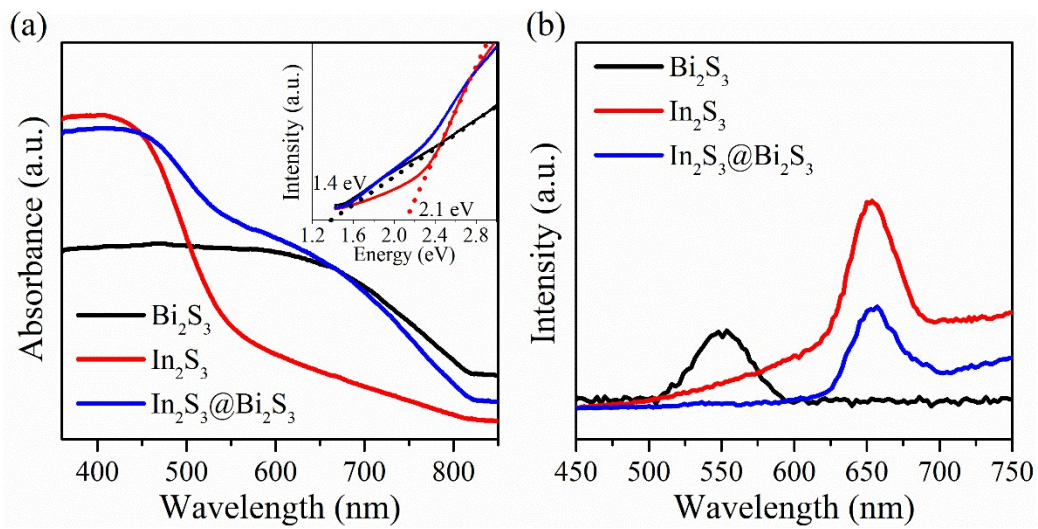

**Fig. S4.** (a) The UV-vis absorption spectra for  $\text{Bi}_2\text{S}_3$ ,  $\text{In}_2\text{S}_3$ , and  $\text{In}_2\text{S}_3@\text{Bi}_2\text{S}_3$ , and the inset is the Tauc's plots of these semiconductors, indicating the bandgap of  $\text{Bi}_2\text{S}_3$  and  $\text{In}_2\text{S}_3$  is nearly 1.4 and 2.1 eV. The UV-vis absorption spectra reveal the absorption edge of  $\text{In}_2\text{S}_3@\text{Bi}_2\text{S}_3$  heterostructure has a red-shift compared with  $\text{In}_2\text{S}_3$  and  $\text{Bi}_2\text{S}_3$ . (b) The Photoluminescence (PL) spectra of different samples under excitation ( $\lambda_{\text{ex}} = 365$  nm).



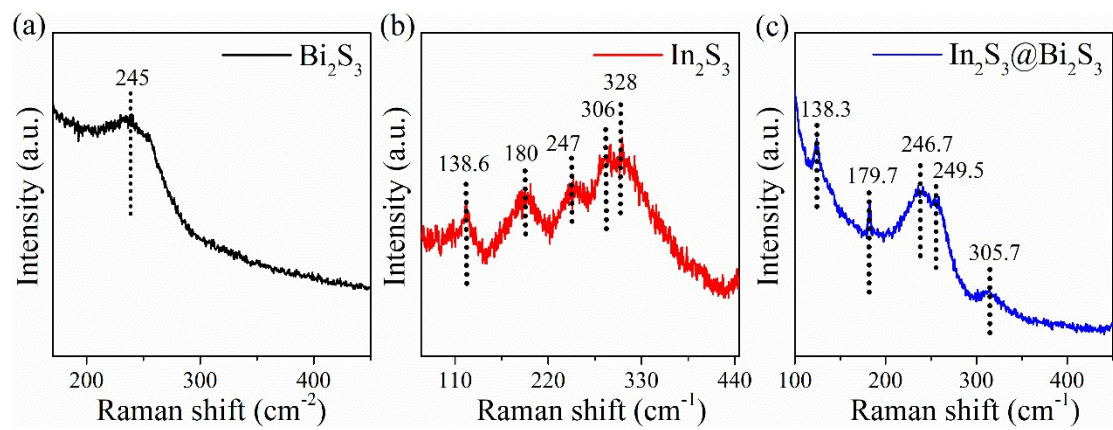

**Fig. S5.** Raman spectra of (a) bare  $\text{Bi}_2\text{S}_3$ , (b) bare  $\text{In}_2\text{S}_3$ , and (c)  $\text{In}_2\text{S}_3@/\text{Bi}_2\text{S}_3$  composite.

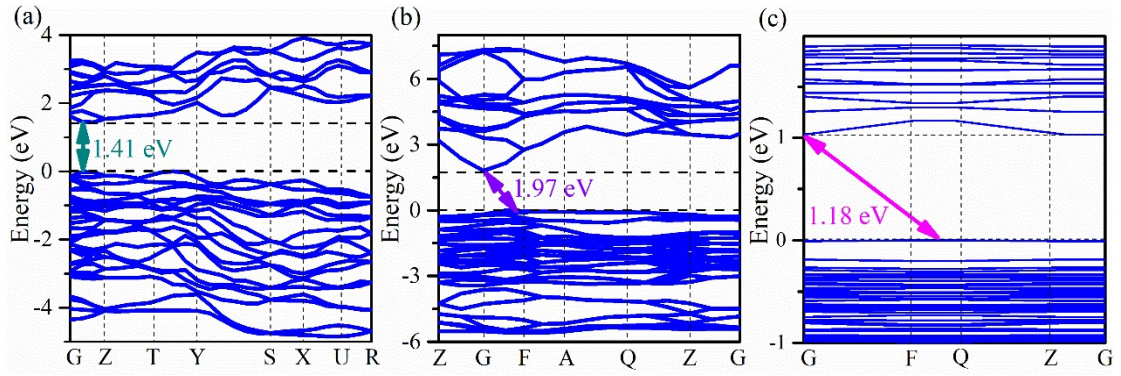

**Fig. S6.** The simulated band structure of (a)  $\text{Bi}_2\text{S}_3$ , (b)  $\text{In}_2\text{S}_3$ , and (c)  $\text{In}_2\text{S}_3@\text{Bi}_2\text{S}_3$ . In detail,  $\text{Bi}_2\text{S}_3$  has a direct bandgap (1.41 eV) where the valance band maximum (VBM) and the conduction band minimum (CBM) both lie at general points between G and Z point. A large bandgap of 1.97 eV is observed for  $\text{In}_2\text{S}_3$ , where the VBM locates between G and F while the CBM locates at G point. Specifically, the slab model of  $\text{In}_2\text{S}_3$  is obtained from the bulk structures on (001) direction with vacuum (10 Å), and the  $\text{Bi}_2\text{S}_3$  (010) direction has been established with vacuum (10 Å).

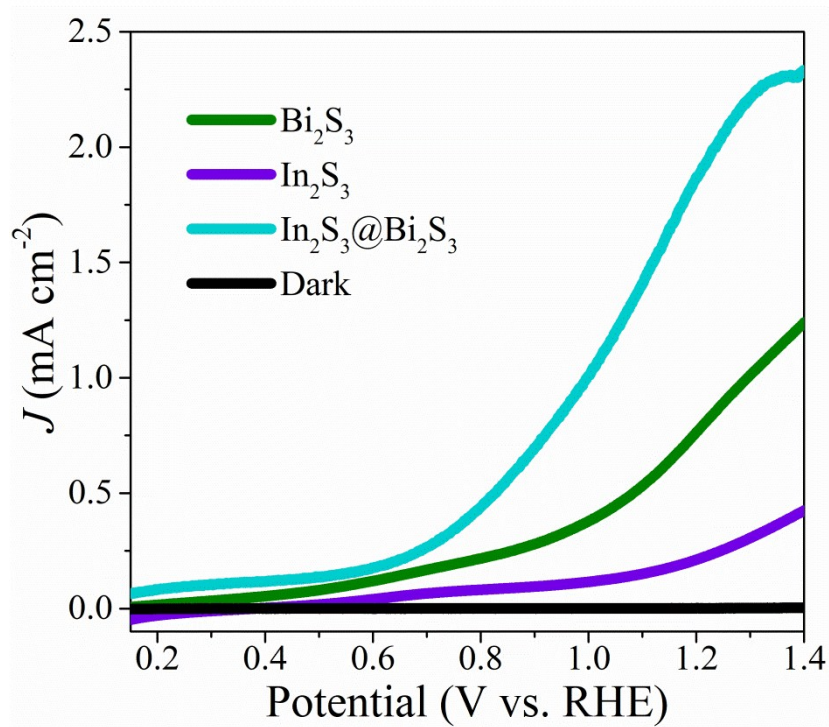

**Fig. S7.**  $J$ - $V$  plots of various samples for sulfite oxidation in 0.2 M  $\text{Na}_2\text{SO}_4$  with 0.5 M  $\text{Na}_2\text{SO}_3$  under AM 1.5G illumination.

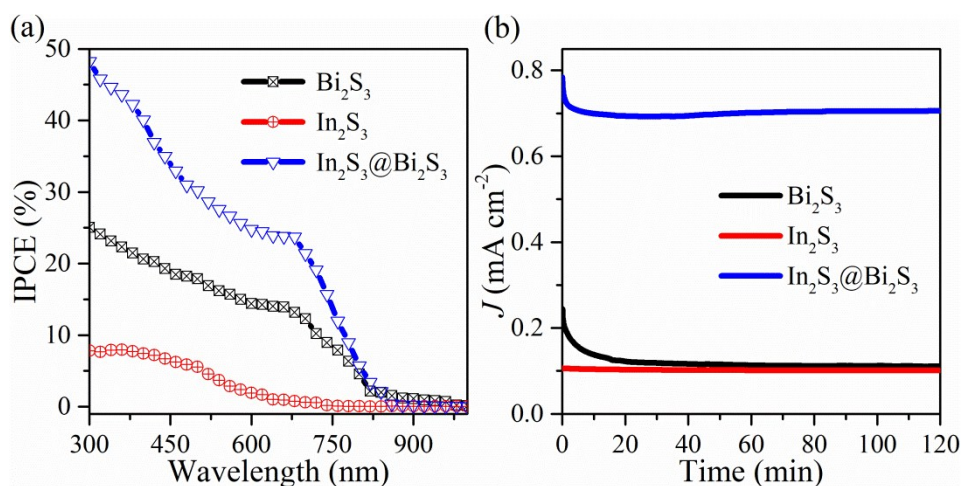

**Fig. S8.** (a) IPCE for different samples at 1.23 V vs. RHE, and (b) photocurrent density versus time at 0.9 V vs. RHE in 0.2 M Na<sub>2</sub>SO<sub>4</sub> solution. The IPCE value of In<sub>2</sub>S<sub>3</sub>@Bi<sub>2</sub>S<sub>3</sub> varies between 32%-45% at 500-350 nm and maintains a relative high value under broadband-light irradiation, suggesting the PEC performance of In<sub>2</sub>S<sub>3</sub>@Bi<sub>2</sub>S<sub>3</sub> is higher than Bi<sub>2</sub>S<sub>3</sub> nanorods and In<sub>2</sub>S<sub>3</sub> nanosheets. During stability test for 2 hours, the results exhibit In<sub>2</sub>S<sub>3</sub>@Bi<sub>2</sub>S<sub>3</sub> possess around 90% of its initial photocurrent, confirming the good stability of 2D/1D In<sub>2</sub>S<sub>3</sub>@Bi<sub>2</sub>S<sub>3</sub> heterostructures under continuous water oxidation.

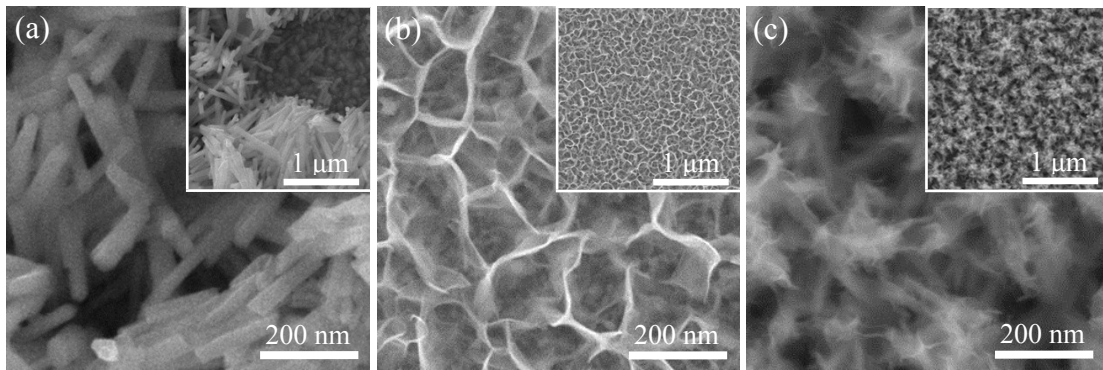

**Fig. S9.** SEM images of typical (a)  $\text{Bi}_2\text{S}_3$  nanorods, (b)  $\text{In}_2\text{S}_3$  nanosheets, and (c)  $\text{In}_2\text{S}_3@ \text{Bi}_2\text{S}_3$  heterostructure after stability test for 2 hours.

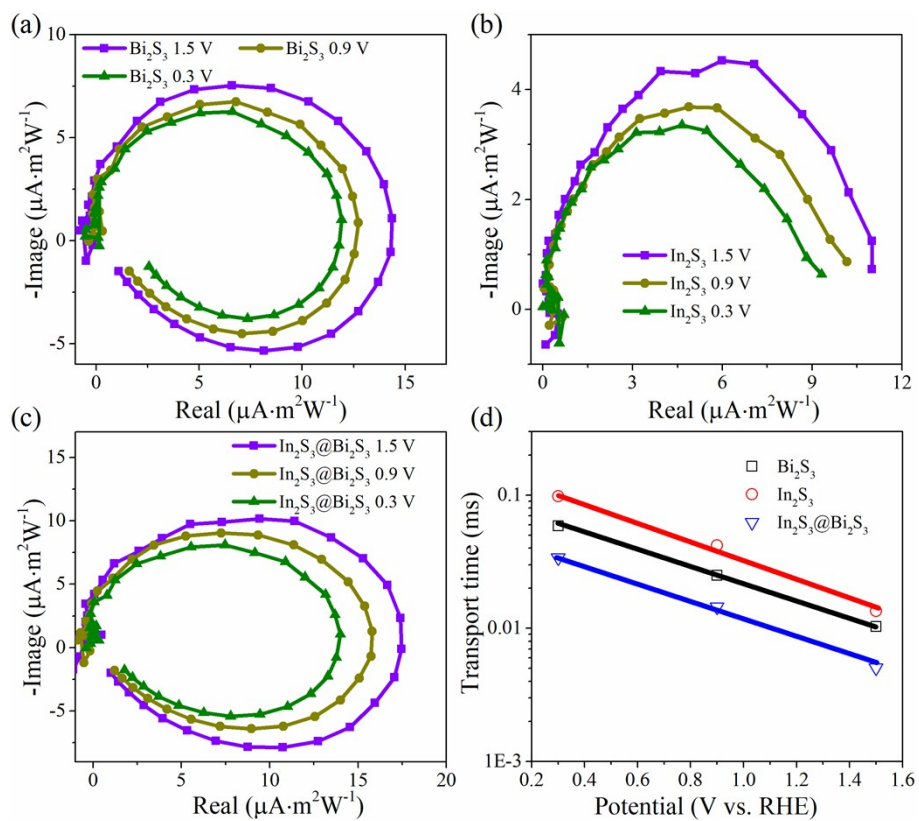

**Fig. S10.** Plots of CIMPS complex plane of (a) Bi<sub>2</sub>S<sub>3</sub>, (b) In<sub>2</sub>S<sub>3</sub>, and (c) In<sub>2</sub>S<sub>3</sub>@Bi<sub>2</sub>S<sub>3</sub> with water oxidation at different applied potential (1.5, 0.9, and 0.3 V vs. RHE) with constant power density (5 mW cm<sup>-2</sup>). (d) The electrons' transport time ( $\tau$ ) originated from CIMPS complex plane at different potential in 0.2 M Na<sub>2</sub>SO<sub>4</sub> solution (pH 6.8).

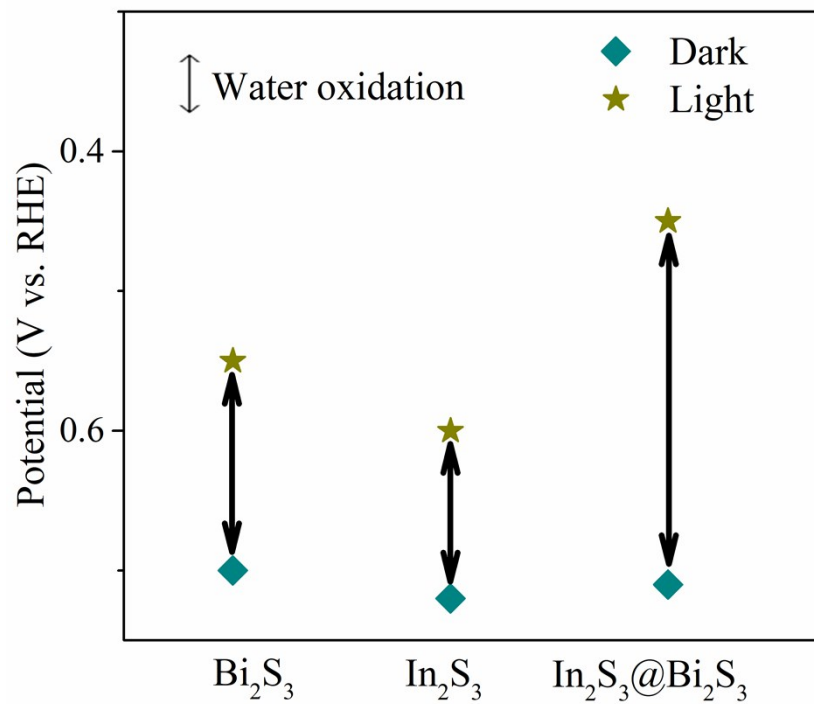

**Fig. S11.** The photovoltage ( $V_{ph}$ ) for various photoanodes, which estimated by the onset potential (E) shift of anodic current in dark and under illumination. The  $V_{ph}$  could be written as:  $V_{ph} = |E_{dark} - E_{light}|$ .

**Table S1** The PEC performances of In<sub>2</sub>S<sub>3</sub>-based compounds compared with this study.

| Photocatalyst                                                           | Electrolyte                                                               | Applied bias         | J (μA/cm <sup>2</sup> )                                     | J (μA/cm <sup>2</sup> )                                                       | Multiple    | Ref                  |
|-------------------------------------------------------------------------|---------------------------------------------------------------------------|----------------------|-------------------------------------------------------------|-------------------------------------------------------------------------------|-------------|----------------------|
|                                                                         |                                                                           |                      | Original                                                    | Improved                                                                      |             |                      |
| 2D β-In <sub>2</sub> S <sub>3</sub>                                     | ---                                                                       | 1.0 V vs.<br>NHE     | 0.03 (In <sub>2</sub> S <sub>3</sub> )                      | 0.15 (In <sub>2</sub> S <sub>3</sub> )                                        | 5.0         | 2                    |
| In <sub>2</sub> O <sub>3</sub> /<br>In <sub>2</sub> S <sub>3</sub> /CdS | 0.1 M Na <sub>2</sub> SO <sub>4</sub>                                     | ---                  | 300 (In <sub>2</sub> O <sub>3</sub> /<br>In <sub>2</sub> S) | 700 (In <sub>2</sub> O <sub>3</sub> /<br>In <sub>2</sub> S <sub>3</sub> /CdS) | 2.3         | 3                    |
| In <sub>2</sub> O <sub>3-x</sub> /In <sub>2</sub> S <sub>3</sub>        | 1.0 M KOH                                                                 | 1.4 V vs.<br>NHE     | 137 (Pure In <sub>2</sub> S <sub>3</sub> )                  | 1570 (In <sub>2</sub> O <sub>3-x</sub> /<br>In <sub>2</sub> S <sub>3</sub> )  | 11.5        | 4                    |
| In <sub>2</sub> S <sub>3</sub> /MoS <sub>2</sub> /CdS                   | 0.1 M Na <sub>2</sub> SO <sub>4</sub>                                     | ---                  | 25 (In <sub>2</sub> S <sub>3</sub> /CdS)                    | 250<br>(In <sub>2</sub> S <sub>3</sub> /MoS <sub>2</sub> /<br>CdS)            | 10          | 5                    |
| In <sub>2</sub> S <sub>3</sub> -CNT                                     | 0.2 M Na <sub>2</sub> SO <sub>4</sub>                                     | ---                  | 0.7 Blank In <sub>2</sub> S <sub>3</sub>                    | 1.1 (In <sub>2</sub> S <sub>3</sub> -<br>CNT)                                 | 1.6         | 6                    |
| Titania@β-In <sub>2</sub> S <sub>3</sub>                                | 0.25 M Na <sub>2</sub> S<br>and 0.35 M<br>Na <sub>2</sub> SO <sub>3</sub> | 0.4 V vs.<br>Ag/AgCl | 800 1-<br>TiO <sub>2</sub> @In <sub>2</sub> S <sub>3</sub>  | 1400 2-<br>TiO <sub>2</sub> @In <sub>2</sub> S <sub>3</sub>                   | 1.75        | 7                    |
| MoS <sub>2</sub> @In <sub>2</sub> S <sub>3</sub>                        | 0.2 M Na <sub>2</sub> S<br>and Na <sub>2</sub> SO <sub>3</sub>            | 0.2 V vs. SCE        | 0.3                                                         | 1.0<br>MoS <sub>2</sub> @In <sub>2</sub> S <sub>3</sub>                       | 3.3         | 8                    |
| In <sub>2</sub> S <sub>3</sub> /Anatase/R<br>utile TiO <sub>2</sub>     | 0.3 M Na <sub>2</sub> SO <sub>4</sub>                                     | 1.23 V vs.<br>RHE    | 1350 ANP/RND                                                | 1550<br>In <sub>2</sub> S <sub>3</sub> /ANP/R<br>NP                           | 1.2         | 9                    |
| In <sub>2</sub> S <sub>3</sub> @MCPAs                                   | 1.0 M KCl                                                                 | 1.23 V vs.<br>RHE    | 7.2<br>In <sub>2</sub> S <sub>3</sub> @Planar               | 25.7<br>In <sub>2</sub> S <sub>3</sub> @MCPA                                  | 3.6         | 10                   |
| In <sub>2</sub> S <sub>3</sub> @Bi <sub>2</sub> S <sub>3</sub>          | 0.2 M Na <sub>2</sub> SO <sub>4</sub>                                     | 1.23 V vs.<br>RHE    | <b>150</b> (Pure In <sub>2</sub> S <sub>3</sub> )           | <b>2000</b>                                                                   | <b>13.3</b> | <b>This<br/>work</b> |

**Notes and references**



- 1 P. Li, X. Zhang, C. Hou, Y. Chen and T. He, *Appl. Catal. B-Environ.*, 2018, **238**, 656-663.
- 2 W. Huang, L. Gan, H. Yang, N. Zhou, R. Wang, W. Wu, H. Li, Y. Ma, H. Zeng and T. Zhai, *Adv. Funct. Mater.*, 2017, **27**, 1702448.
- 3 Y. Xiao, G. Tian, Y. Chen, X. Zhang, H. Fu and H. Fu, *Appl. Catal. B-Environ.*, 2018, **225**, 477-486.
- 4 J. Hou, S. Cao, Y. Sun, Y. Wu, F. Liang, Z. Lin and L. Sun, *Adv. Energy Mater.*, 2018, **8**, 170114.
- 5 W. Jiang, Y. Liu, R. Zong, Z. Li, W. Yao and Y. Zhu, *J. Mater. Chem. A*, 2015, **3**, 18406-18012.
- 6 M. Q. Yang, B. Weng and Y. J. Xu, *J. Mater. Chem. A*, 2014, **2**, 1710-1720.
- 7 A. Mumtaz, N. M. Mohamed, M. Mazhar, M. A. Ehsan and M. S. Mohamed Saheed, *ACS Appl. Mater. Interfaces*, 2016, **8**, 9037-9049.
- 8 F. Liu, Y. Jiang, J. Yang, M. Hao, Z. Tong, L. Jiang and Z. Wu, *Chem. Commun.*, 2016, **52**, 1867-1870.
- 9 J. S. Yang and J. J. Wu, *ACS Appl. Mater. Interfaces*, 2018, **10**, 3714-3722.
- 10 M. Li, L. Chen, C. Zhou, C. Jin, Y. Su and Y. Zhang, *Nanoscale*, 2019, **11**, 18071-18080.
